# Supplementary material for: Comparative transcriptome analyses of maize seedling root responses to salt stress
Source: PeerJ journal article supplement (doi:10.7717/peerj.10765), 2021-03-02
Supplement: Figure_Supplementary.pdf [file Figure_Supplementary.pdf]

## Supporting information

Additional supporting information may be found in the online version of this article:

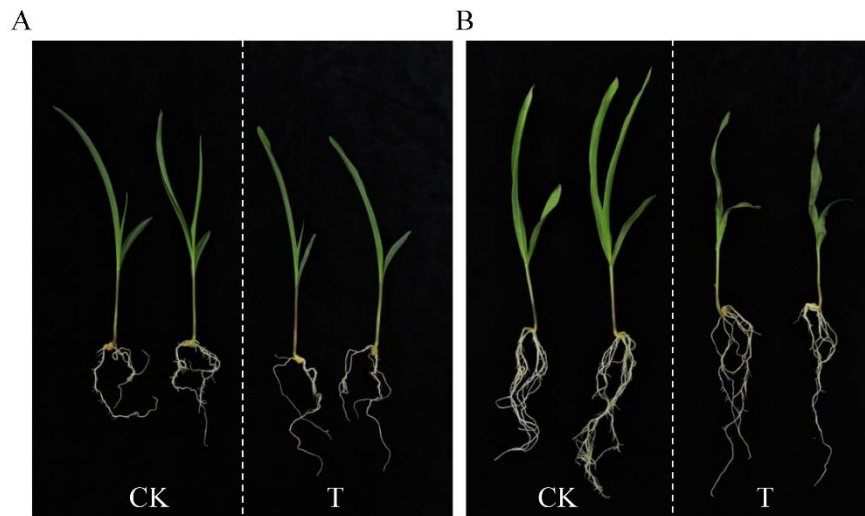

**Figure. S1** Phenotypes in maize lines L2010-3 and BML1234 at 72 hours under 150 mM NaCl treatment. (A) the salt-tolerant line L2010-3. (B) the salt-sensitive BML1234.

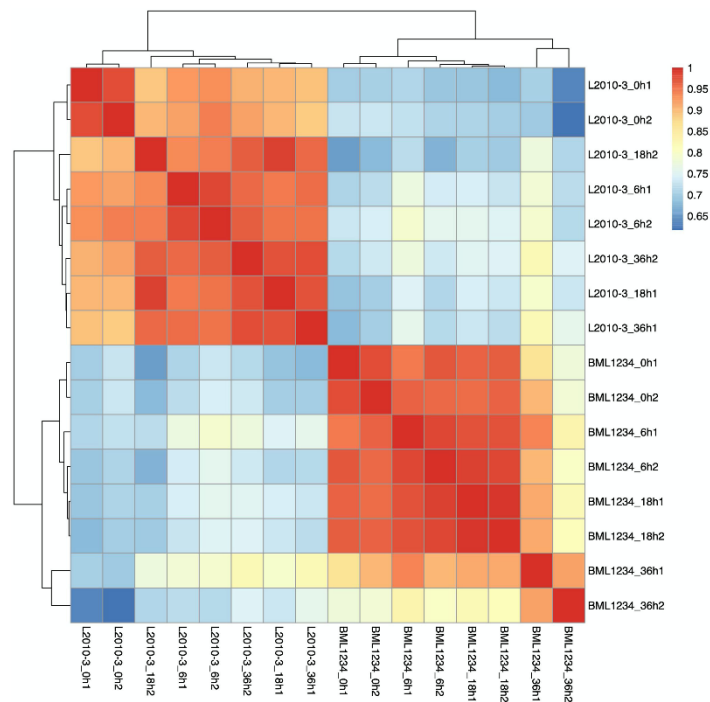

**Figure. S2** Spearman's correlation analysis between biological replicates for RNA-seq at three stages. Color levels correspond to the degree of correlation in each replicate.

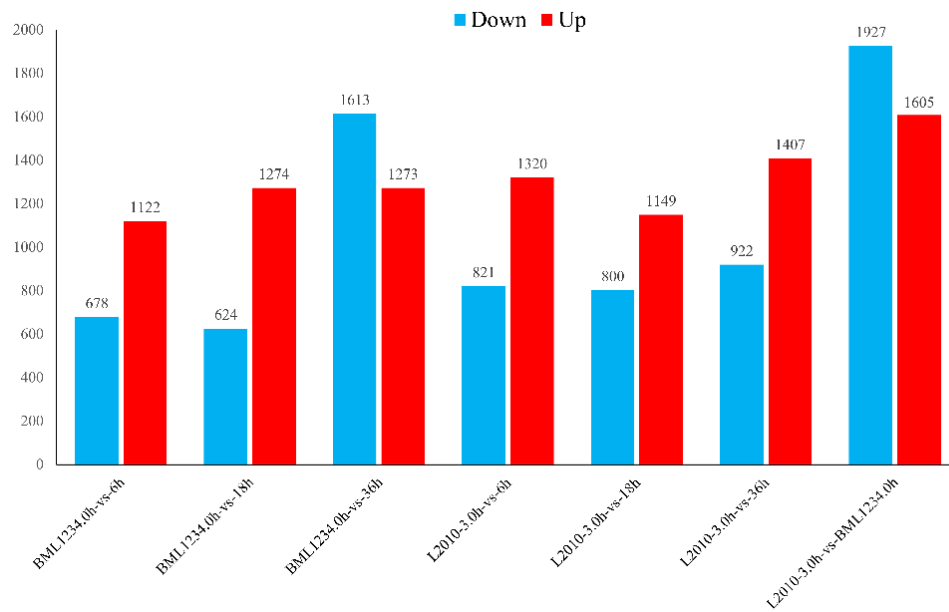

**Figure. S3** Numbers of DEGs in the salt-tolerant line (L2010-3) and salt-sensitive line (BML1234) under normal condition (0 h) and salt treatment (from 6 to 36 h).

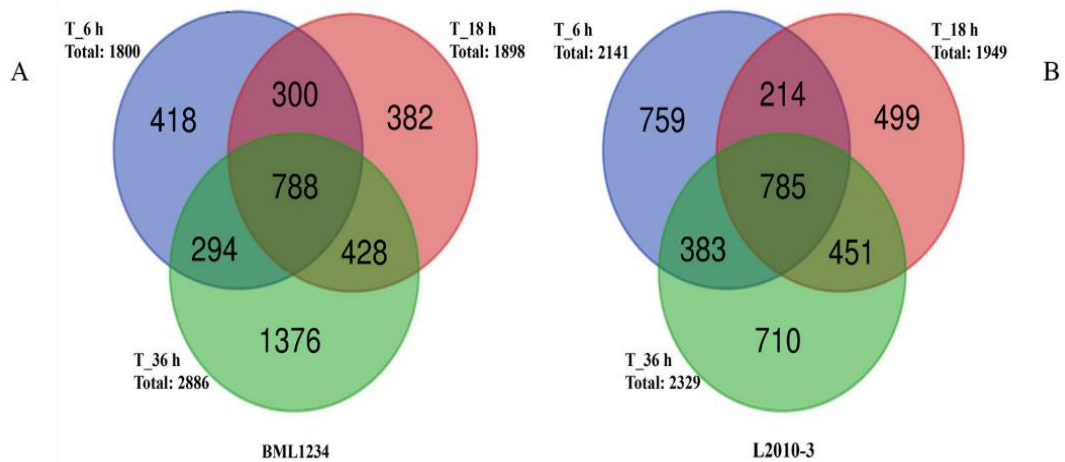

**Figure. S4** Venn diagrams of genes differentially expressed at the three stages in the salt-sensitive line BML1234 and the salt-tolerant line L2010-3.

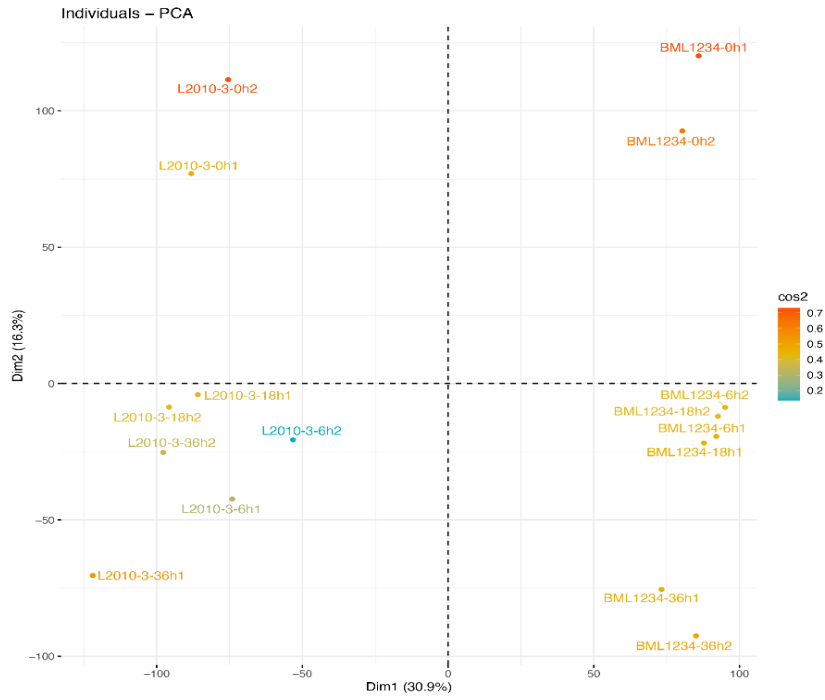

**Figure. S5** Principal Component Analysis (PCA) diagram for the 16 libraries.

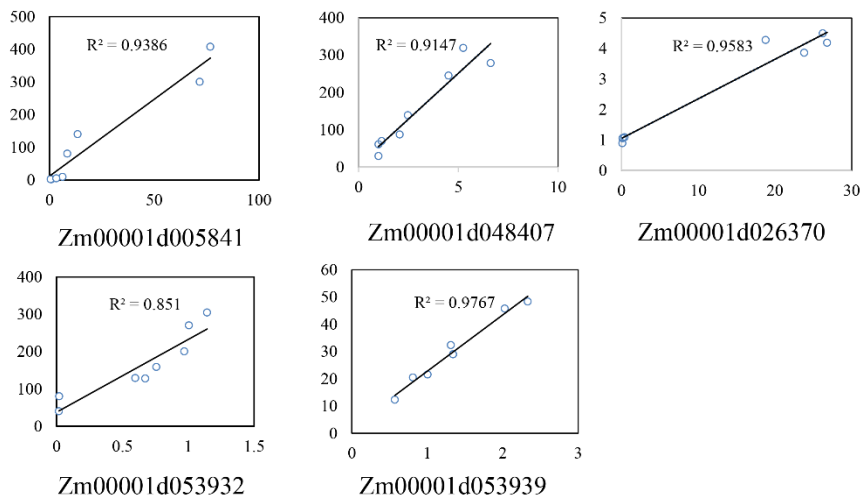

**Figure. S6** Correlation analysis between RNA-seq and qPCR data.
